# Supplementary material
Source: Springer Nature journal article supplement (https://www.springermedizin.de/resource/supplementary/12936_2013_3177_MOESM5_ESM.pdf/9545236)
Supplement: MOESM5 [file 9545236]

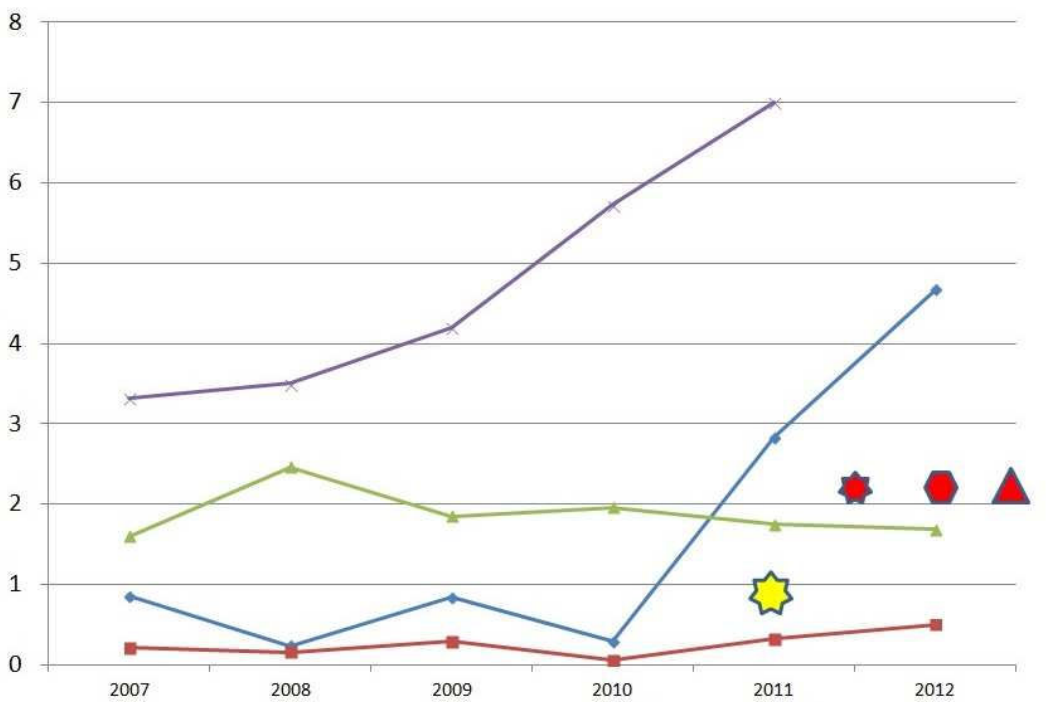

— API in Kokap

— API in Kulonprogo

— API in Indonesia

— Average number of hamlets/VMW

★ cluster Hargomulyo

⬡ cluster Hargetirto

▲ cluster Kalirejo

★ Malaria outbreak at neighbouring district
